# Supplementary material
Source: PubMed Central journal article supplement (PMC3643119)
Supplement: NIHMS464244-supplement-Supplementary_Table.pdf [file NIHMS464244-supplement-Supplementary_Table.pdf]

|        |      |          |          |      |          |          |          |          |          |          |          |          |          |          |          |          |          |          |          |          |          |           |              |              |              |              |              |              |              |              |              |              |              |              |              |              |              |              |              |              |              |              |           |           |           |           |           |           |           |          |          |          |          |          |
|--------|------|----------|----------|------|----------|----------|----------|----------|----------|----------|----------|----------|----------|----------|----------|----------|----------|----------|----------|----------|----------|-----------|--------------|--------------|--------------|--------------|--------------|--------------|--------------|--------------|--------------|--------------|--------------|--------------|--------------|--------------|--------------|--------------|--------------|--------------|--------------|--------------|-----------|-----------|-----------|-----------|-----------|-----------|-----------|----------|----------|----------|----------|----------|
| CG 1-2 | CG 3 | CG 4     | CG 5     | CG 6 | CG 7     | CG 8     | CG 9-11  | CG 12    | CG 13    | CG 14-15 | CG 16-17 | CG 18-19 | CG 20    | CG 21-23 | CG 24-25 | CG 26    | CG 27    | CG 28-29 | CG 30-33 | CG 34-39 | CG 40-41 | CG 42-43  | CG 44        | CG 45        | CG 46-52     | CG 53-54     | CG 55-56     | CG 57-61     | CG 62        | CG 63-64     | CG 65        | CG 66-67     | CG 68        | CG 69        | CG 70        | CG 71        |              |              |              |              |              |              |           |           |           |           |           |           |           |          |          |          |          |          |
|        | 1    | 0.544034 | 0.321241 | NA   | 0.242004 | 0.299457 | 0.362918 | 0.271671 | 0.148378 | 0.197567 | 0.358444 | 0.287115 | 0.278274 | 0.154351 | NA       | 0.287115 | 0.012762 | 0.287115 | 0.084217 | 0.075823 | 0.280353 | 0.176235  | 0.004952     | 0.007029111  | 0.108779     | NA           | 0.07839      | -0.033435    | 0.050225     | 0.053369     | 0.087118     | 0.108779     | 0.129982     | 0.088955     | 0.129982     | NA           | 0.043863     |              |              |              |              |              |           |           |           |           |           |           |           |          |          |          |          |          |
|        |      | 1        | 0.356835 | NA   | 0.309826 | 0.229445 | 0.268381 | 0.239464 | 0.132758 | 0.089417 | 0.247366 | 0.294553 | 0.161345 | 0.050073 | NA       | 0.294553 | 0.125968 | 0.294553 | 0.055133 | 0.076532 | 0.244955 | 0.233291  | 0.089405     | -0.026682022 | 0.111859     | NA           | 0.278535     | 0.164246     | 0.207914     | 0.104389     | 0.146564     | 0.111859     | 0.030779     | 0.100999     | 0.030779     | NA           | 0.05044      |              |              |              |              |              |           |           |           |           |           |           |           |          |          |          |          |          |
|        |      |          | 1        | NA   | 0.290093 | 0.142808 | 0.265532 | 0.185747 | 0.160918 | 0.213745 | 0.171877 | 0.184051 | 0.164709 | 0.158353 | NA       | 0.184051 | -0.04321 | 0.184051 | 0.048014 | 0.126852 | 0.263067 | 0.212041  | 0.077503     | -0.008263998 | 0.015543     | NA           | 0.130499     | 0.052883     | 0.060475     | 0.014722     | 0.013284     | 0.015543     | 0.059942     | 0.069945     | 0.059942     | NA           | 0.113856     |              |              |              |              |              |           |           |           |           |           |           |           |          |          |          |          |          |
|        |      |          |          | 1    | NA        | NA           | NA           | NA           | NA           | NA           | NA           | NA           | NA           | NA           | NA           | NA           | NA           | NA           | NA           | NA           | NA           |              |              |              |              |           |           |           |           |           |           |           |          |          |          |          |          |
|        |      |          |          | 1    | 0.357323 | 0.280654 | 0.104288 | 0.133653 | 0.137122 | 0.178801 | 0.121704 | 0.160012 | 0.12246  | NA       | 0.121704 | 0.024427 | 0.121704 | 0.063225 | -0.05392 | 0.082403 | 0.135942 | -0.085375 | -0.108265781 | 0.101445     | NA           | 0.040554     | -0.102533    | 0.114824     | 0.005422     | -0.044018    | 0.101445     | 0.012072     | 0.140763     | 0.012072     | NA           | -0.01128     |              |              |              |              |              |              |           |           |           |           |           |           |           |          |          |          |          |          |
|        |      |          |          |      | 1        | 0.438162 | 0.250574 | 0.232046 | 0.199554 | 0.253601 | 0.167408 | 0.241573 | 0.185487 | NA       | 0.167408 | -0.03054 | 0.167408 | 0.05075  | -0.09478 | 0.030344 | 0.075234 | 0.042347  | 0.084736155  | 0.10376      | NA           | 0.171074     | -0.030847    | 0.138906     | 0.094345     | -0.00997     | 0.10376      | -0.128362    | -0.056632    | -0.128362    | NA           | -0.05884     |              |              |              |              |              |              |           |           |           |           |           |           |           |          |          |          |          |          |
|        |      |          |          |      |          | 1        | 0.443848 | 0.391204 | 0.17817  | 0.24460  | 0.353215 | 0.229075 | 0.253996 | NA       | 0.353215 | 0.004152 | 0.353215 | 0.111492 | 0.05478  | 0.067125 | 0.100377 | 0.020575  | -0.054471967 | 0.136143     | NA           | 0.045173     | 0.034403     | -0.015831    | 0.023201     | -0.017732    | 0.136143     | 0.081834     | 0.059289     | 0.081834     | NA           | -0.01402     |              |              |              |              |              |              |           |           |           |           |           |           |           |          |          |          |          |          |
|        |      |          |          |      |          |          | 1        | 0.443848 | 0.391204 | 0.17817  | 0.24460  | 0.353215 | 0.229075 | 0.253996 | NA       | 0.353215 | 0.004152 | 0.353215 | 0.111492 | 0.05478  | 0.067125 | 0.100377  | 0.020575     | -0.054471967 | 0.136143     | NA           | 0.045173     | 0.034403     | -0.015831    | 0.023201     | -0.017732    | 0.136143     | 0.081834     | 0.059289     | 0.081834     | NA           | -0.01402     |              |              |              |              |              |           |           |           |           |           |           |           |          |          |          |          |          |
|        |      |          |          |      |          |          | 1        | 0.443848 | 0.391204 | 0.17817  | 0.24460  | 0.353215 | 0.229075 | 0.253996 | NA       | 0.353215 | 0.004152 | 0.353215 | 0.111492 | 0.05478  | 0.067125 | 0.100377  | 0.020575     | -0.054471967 | 0.136143     | NA           | 0.045173     | 0.034403     | -0.015831    | 0.023201     | -0.017732    | 0.136143     | 0.081834     | 0.059289     | 0.081834     | NA           | -0.01402     |              |              |              |              |              |           |           |           |           |           |           |           |          |          |          |          |          |
|        |      |          |          |      |          |          |          | 1        | 0.443848 | 0.391204 | 0.17817  | 0.24460  | 0.353215 | 0.229075 | 0.253996 | NA       | 0.353215 | 0.004152 | 0.353215 | 0.111492 | 0.05478  | 0.067125  | 0.100377     | 0.020575     | -0.054471967 | 0.136143     | NA           | 0.045173     | 0.034403     | -0.015831    | 0.023201     | -0.017732    | 0.136143     | 0.081834     | 0.059289     | 0.081834     | NA           | -0.01402     |              |              |              |              |           |           |           |           |           |           |           |          |          |          |          |          |
|        |      |          |          |      |          |          |          | 1        | 0.443848 | 0.391204 | 0.17817  | 0.24460  | 0.353215 | 0.229075 | 0.253996 | NA       | 0.353215 | 0.004152 | 0.353215 | 0.111492 | 0.05478  | 0.067125  | 0.100377     | 0.020575     | -0.054471967 | 0.136143     | NA           | 0.045173     | 0.034403     | -0.015831    | 0.023201     | -0.017732    | 0.136143     | 0.081834     | 0.059289     | 0.081834     | NA           | -0.01402     |              |              |              |              |           |           |           |           |           |           |           |          |          |          |          |          |
|        |      |          |          |      |          |          |          |          | 1        | 0.443848 | 0.391204 | 0.17817  | 0.24460  | 0.353215 | 0.229075 | 0.253996 | NA       | 0.353215 | 0.004152 | 0.353215 | 0.111492 | 0.05478   | 0.067125     | 0.100377     | 0.020575     | -0.054471967 | 0.136143     | NA           | 0.045173     | 0.034403     | -0.015831    | 0.023201     | -0.017732    | 0.136143     | 0.081834     | 0.059289     | 0.081834     | NA           | -0.01402     |              |              |              |           |           |           |           |           |           |           |          |          |          |          |          |
|        |      |          |          |      |          |          |          |          |          | 1        | 0.443848 | 0.391204 | 0.17817  | 0.24460  | 0.353215 | 0.229075 | 0.253996 | NA       | 0.353215 | 0.004152 | 0.353215 | 0.111492  | 0.05478      | 0.067125     | 0.100377     | 0.020575     | -0.054471967 | 0.136143     | NA           | 0.045173     | 0.034403     | -0.015831    | 0.023201     | -0.017732    | 0.136143     | 0.081834     | 0.059289     | 0.081834     | NA           | -0.01402     |              |              |           |           |           |           |           |           |           |          |          |          |          |          |
|        |      |          |          |      |          |          |          |          |          |          | 1        | 0.443848 | 0.391204 | 0.17817  | 0.24460  | 0.353215 | 0.229075 | 0.253996 | NA       | 0.353215 | 0.004152 | 0.353215  | 0.111492     | 0.05478      | 0.067125     | 0.100377     | 0.020575     | -0.054471967 | 0.136143     | NA           | 0.045173     | 0.034403     | -0.015831    | 0.023201     | -0.017732    | 0.136143     | 0.081834     | 0.059289     | 0.081834     | NA           | -0.01402     |              |           |           |           |           |           |           |           |          |          |          |          |          |
|        |      |          |          |      |          |          |          |          |          |          |          | 1        | 0.443848 | 0.391204 | 0.17817  | 0.24460  | 0.353215 | 0.229075 | 0.253996 | NA       | 0.353215 | 0.004152  | 0.353215     | 0.111492     | 0.05478      | 0.067125     | 0.100377     | 0.020575     | -0.054471967 | 0.136143     | NA           | 0.045173     | 0.034403     | -0.015831    | 0.023201     | -0.017732    | 0.136143     | 0.081834     | 0.059289     | 0.081834     | NA           | -0.01402     |           |           |           |           |           |           |           |          |          |          |          |          |
|        |      |          |          |      |          |          |          |          |          |          |          |          | 1        | 0.443848 | 0.391204 | 0.17817  | 0.24460  | 0.353215 | 0.229075 | 0.253996 | NA       | 0.353215  | 0.004152     | 0.353215     | 0.111492     | 0.05478      | 0.067125     | 0.100377     | 0.020575     | -0.054471967 | 0.136143     | NA           | 0.045173     | 0.034403     | -0.015831    | 0.023201     | -0.017732    | 0.136143     | 0.081834     | 0.059289     | 0.081834     | NA           | -0.01402  |           |           |           |           |           |           |          |          |          |          |          |
|        |      |          |          |      |          |          |          |          |          |          |          |          |          | 1        | 0.443848 | 0.391204 | 0.17817  | 0.24460  | 0.353215 | 0.229075 | 0.253996 | NA        | 0.353215     | 0.004152     | 0.353215     | 0.111492     | 0.05478      | 0.067125     | 0.100377     | 0.020575     | -0.054471967 | 0.136143     | NA           | 0.045173     | 0.034403     | -0.015831    | 0.023201     | -0.017732    | 0.136143     | 0.081834     | 0.059289     | 0.081834     | NA        | -0.01402  |           |           |           |           |           |          |          |          |          |          |
|        |      |          |          |      |          |          |          |          |          |          |          |          |          |          | 1        | 0.443848 | 0.391204 | 0.17817  | 0.24460  | 0.353215 | 0.229075 | 0.253996  | NA           | 0.353215     | 0.004152     | 0.353215     | 0.111492     | 0.05478      | 0.067125     | 0.100377     | 0.020575     | -0.054471967 | 0.136143     | NA           | 0.045173     | 0.034403     | -0.015831    | 0.023201     | -0.017732    | 0.136143     | 0.081834     | 0.059289     | 0.081834  | NA        | -0.01402  |           |           |           |           |          |          |          |          |          |
|        |      |          |          |      |          |          |          |          |          |          |          |          |          |          |          | 1        | 0.443848 | 0.391204 | 0.17817  | 0.24460  | 0.353215 | 0.229075  | 0.253996     | NA           | 0.353215     | 0.004152     | 0.353215     | 0.111492     | 0.05478      | 0.067125     | 0.100377     | 0.020575     | -0.054471967 | 0.136143     | NA           | 0.045173     | 0.034403     | -0.015831    | 0.023201     | -0.017732    | 0.136143     | 0.081834     | 0.059289  | 0.081834  | NA        | -0.01402  |           |           |           |          |          |          |          |          |
|        |      |          |          |      |          |          |          |          |          |          |          |          |          |          |          |          | 1        | 0.443848 | 0.391204 | 0.17817  | 0.24460  | 0.353215  | 0.229075     | 0.253996     | NA           | 0.353215     | 0.004152     | 0.353215     | 0.111492     | 0.05478      | 0.067125     | 0.100377     | 0.020575     | -0.054471967 | 0.136143     | NA           | 0.045173     | 0.034403     | -0.015831    | 0.023201     | -0.017732    | 0.136143     | 0.081834  | 0.059289  | 0.081834  | NA        | -0.01402  |           |           |          |          |          |          |          |
|        |      |          |          |      |          |          |          |          |          |          |          |          |          |          |          |          |          | 1        | 0.443848 | 0.391204 | 0.17817  | 0.24460   | 0.353215     | 0.229075     | 0.253996     | NA           | 0.353215     | 0.004152     | 0.353215     | 0.111492     | 0.05478      | 0.067125     | 0.100377     | 0.020575     | -0.054471967 | 0.136143     | NA           | 0.045173     | 0.034403     | -0.015831    | 0.023201     | -0.017732    | 0.136143  | 0.081834  | 0.059289  | 0.081834  | NA        | -0.01402  |           |          |          |          |          |          |
|        |      |          |          |      |          |          |          |          |          |          |          |          |          |          |          |          |          |          | 1        | 0.443848 | 0.391204 | 0.17817   | 0.24460      | 0.353215     | 0.229075     | 0.253996     | NA           | 0.353215     | 0.004152     | 0.353215     | 0.111492     | 0.05478      | 0.067125     | 0.100377     | 0.020575     | -0.054471967 | 0.136143     | NA           | 0.045173     | 0.034403     | -0.015831    | 0.023201     | -0.017732 | 0.136143  | 0.081834  | 0.059289  | 0.081834  | NA        | -0.01402  |          |          |          |          |          |
|        |      |          |          |      |          |          |          |          |          |          |          |          |          |          |          |          |          |          |          | 1        | 0.443848 | 0.391204  | 0.17817      | 0.24460      | 0.353215     | 0.229075     | 0.253996     | NA           | 0.353215     | 0.004152     | 0.353215     | 0.111492     | 0.05478      | 0.067125     | 0.100377     | 0.020575     | -0.054471967 | 0.136143     | NA           | 0.045173     | 0.034403     | -0.015831    | 0.023201  | -0.017732 | 0.136143  | 0.081834  | 0.059289  | 0.081834  | NA        | -0.01402 |          |          |          |          |
|        |      |          |          |      |          |          |          |          |          |          |          |          |          |          |          |          |          |          |          |          | 1        | 0.443848  | 0.391204     | 0.17817      | 0.24460      | 0.353215     | 0.229075     | 0.253996     | NA           | 0.353215     | 0.004152     | 0.353215     | 0.111492     | 0.05478      | 0.067125     | 0.100377     | 0.020575     | -0.054471967 | 0.136143     | NA           | 0.045173     | 0.034403     | -0.015831 | 0.023201  | -0.017732 | 0.136143  | 0.081834  | 0.059289  | 0.081834  | NA       | -0.01402 |          |          |          |
|        |      |          |          |      |          |          |          |          |          |          |          |          |          |          |          |          |          |          |          |          |          | 1         | 0.443848     | 0.391204     | 0.17817      | 0.24460      | 0.353215     | 0.229075     | 0.253996     | NA           | 0.353215     | 0.004152     | 0.353215     | 0.111492     | 0.05478      | 0.067125     | 0.100377     | 0.020575     | -0.054471967 | 0.136143     | NA           | 0.045173     | 0.034403  | -0.015831 | 0.023201  | -0.017732 | 0.136143  | 0.081834  | 0.059289  | 0.081834 | NA       | -0.01402 |          |          |
|        |      |          |          |      |          |          |          |          |          |          |          |          |          |          |          |          |          |          |          |          |          |           | 1            | 0.443848     | 0.391204     | 0.17817      | 0.24460      | 0.353215     | 0.229075     | 0.253996     | NA           | 0.353215     | 0.004152     | 0.353215     | 0.111492     | 0.05478      | 0.067125     | 0.100377     | 0.020575     | -0.054471967 | 0.136143     | NA           | 0.045173  | 0.034403  | -0.015831 | 0.023201  | -0.017732 | 0.136143  | 0.081834  | 0.059289 | 0.081834 | NA       | -0.01402 |          |
|        |      |          |          |      |          |          |          |          |          |          |          |          |          |          |          |          |          |          |          |          |          |           |              | 1            | 0.443848     | 0.391204     | 0.17817      | 0.24460      | 0.353215     | 0.229075     | 0.253996     | NA           | 0.353215     | 0.004152     | 0.353215     | 0.111492     | 0.05478      | 0.067125     | 0.100377     | 0.020575     | -0.054471967 | 0.136143     | NA        | 0.045173  | 0.034403  | -0.015831 | 0.023201  | -0.017732 | 0.136143  | 0.081834 | 0.059289 | 0.081834 | NA       | -0.01402 |
|        |      |          |          |      |          |          |          |          |          |          |          |          |          |          |          |          |          |          |          |          |          |           |              |              | 1            | 0.443848     | 0.391204     | 0.17817      | 0.24460      | 0.353215     | 0.229075     | 0.253996     | NA           | 0.353215     | 0.004152     | 0.353215     | 0.111492     | 0.05478      | 0.067125     | 0.100377     | 0.020575     | -0.054471967 | 0.136143  | NA        | 0.045173  | 0.034403  | -0.015831 | 0.023201  | -0.017732 | 0.136143 | 0.081834 | 0.05     |          |          |
